# Supplementary material
Source: Springer Nature journal article supplement (https://www.springermedizin.de/resource/supplementary/12961_2009_218_MOESM1_ESM.pdf/9571684)

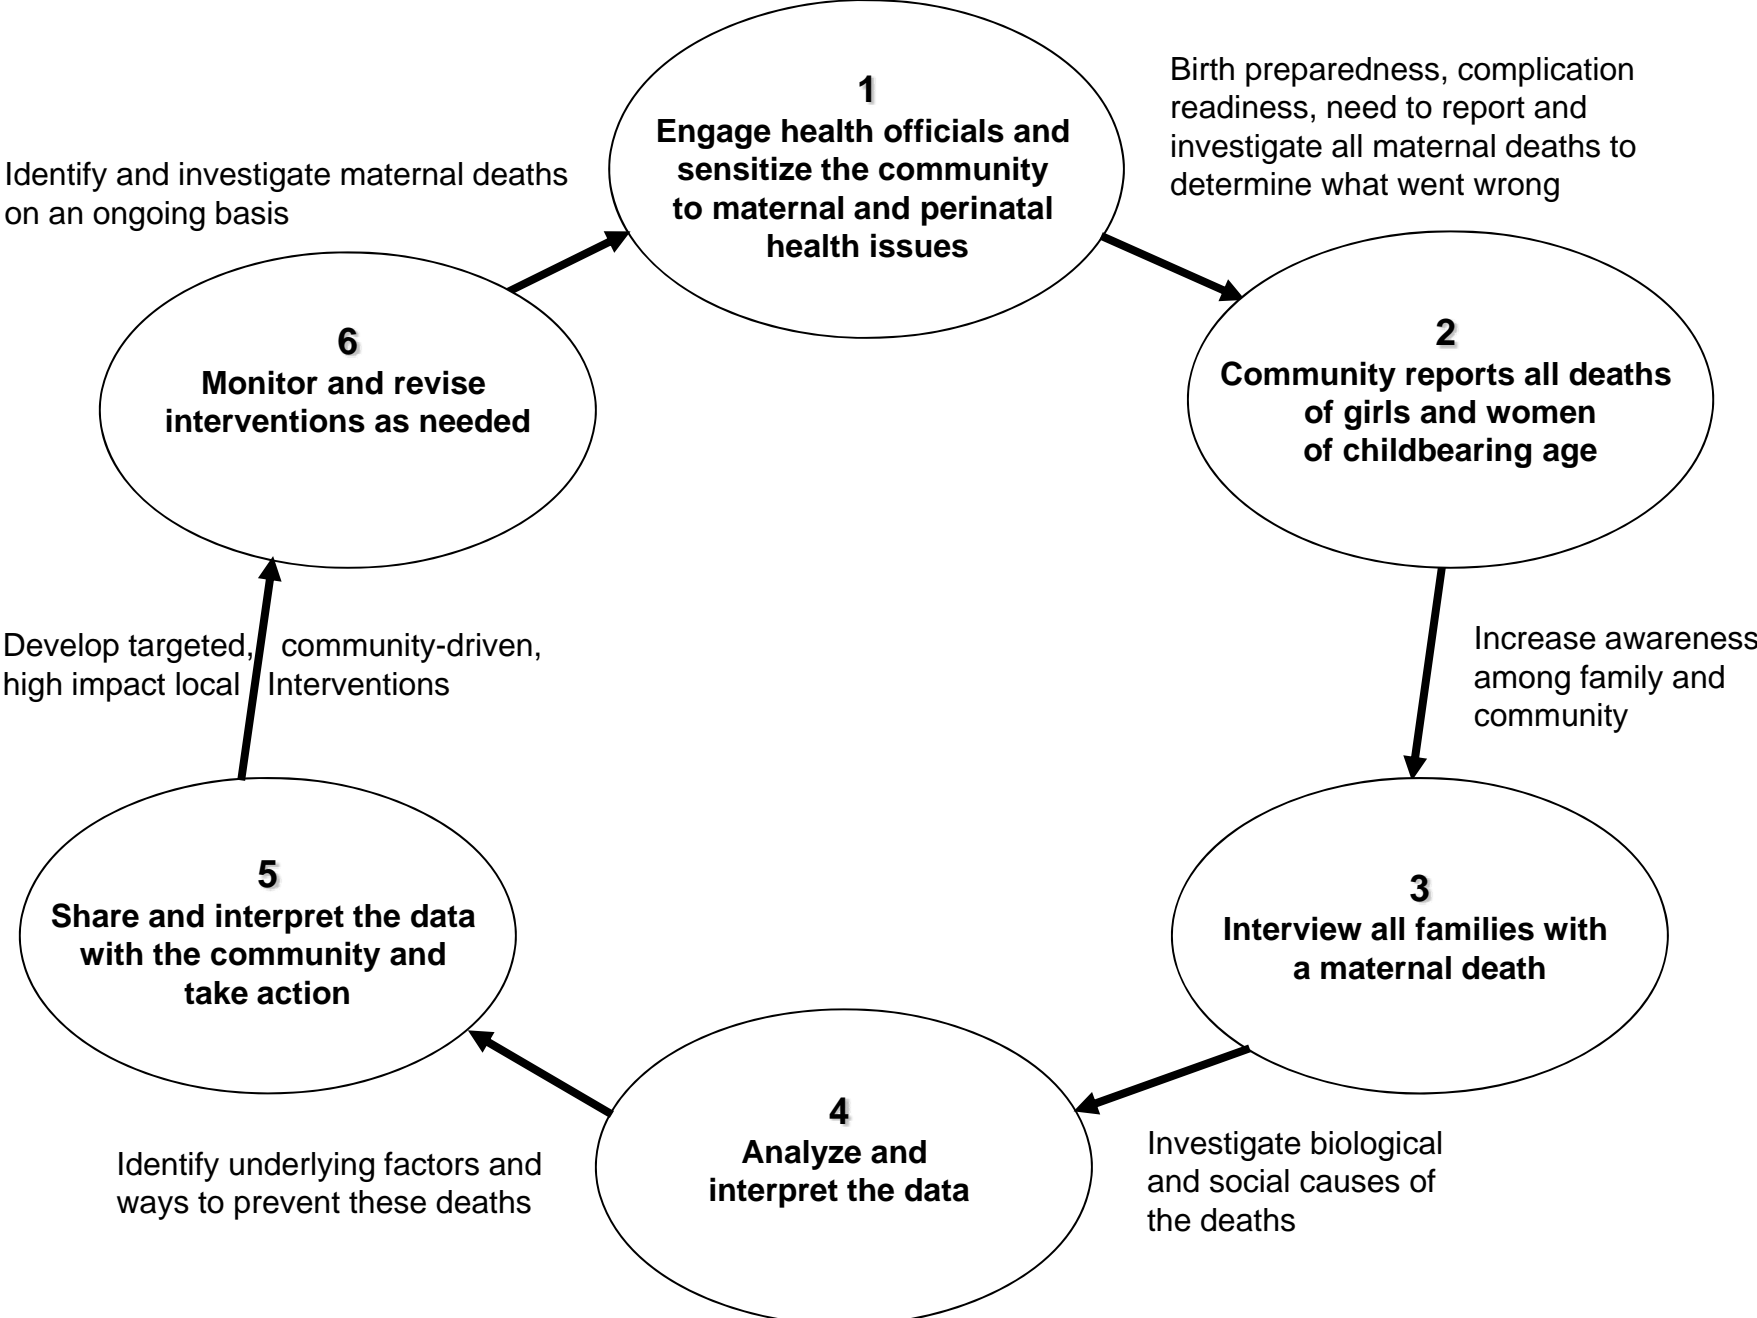

Supplement: MOESM1 [file 9571684]
